# Supplementary material for: Intestinal tissue-resident T cell activation depends on metabolite availability
Source: PubMed Central journal article supplement — Proc Natl Acad Sci U S A. 2022 Aug 15;119(34):e2202144119. doi: 10.1073/pnas.2202144119 (PMC9411733; doi:10.1073/pnas.2202144119), 2022-08-15
Supplement: pnas.2202144119.sapp.pdf [file pnas.2202144119.sapp.pdf]

# Supplemental Figure 1

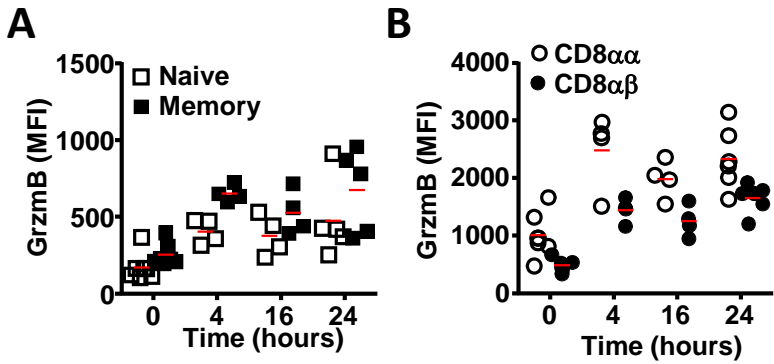

**Supplemental Figure 1. Granzyme B presence in CD8memory and CD8naive T from spleen and CD8 $\alpha\beta$  and CD8 $\alpha\alpha$  cells from SI during activation.** Flow cytometry intracellular staining for granzyme B in memory and naïve CD8 from spleen (**A**) and in intestinal CD8 $\alpha\beta$  and CD8 $\alpha\alpha$  IELs (**B**) at indicated time points (n=4-6).

# Supplemental Figure 2

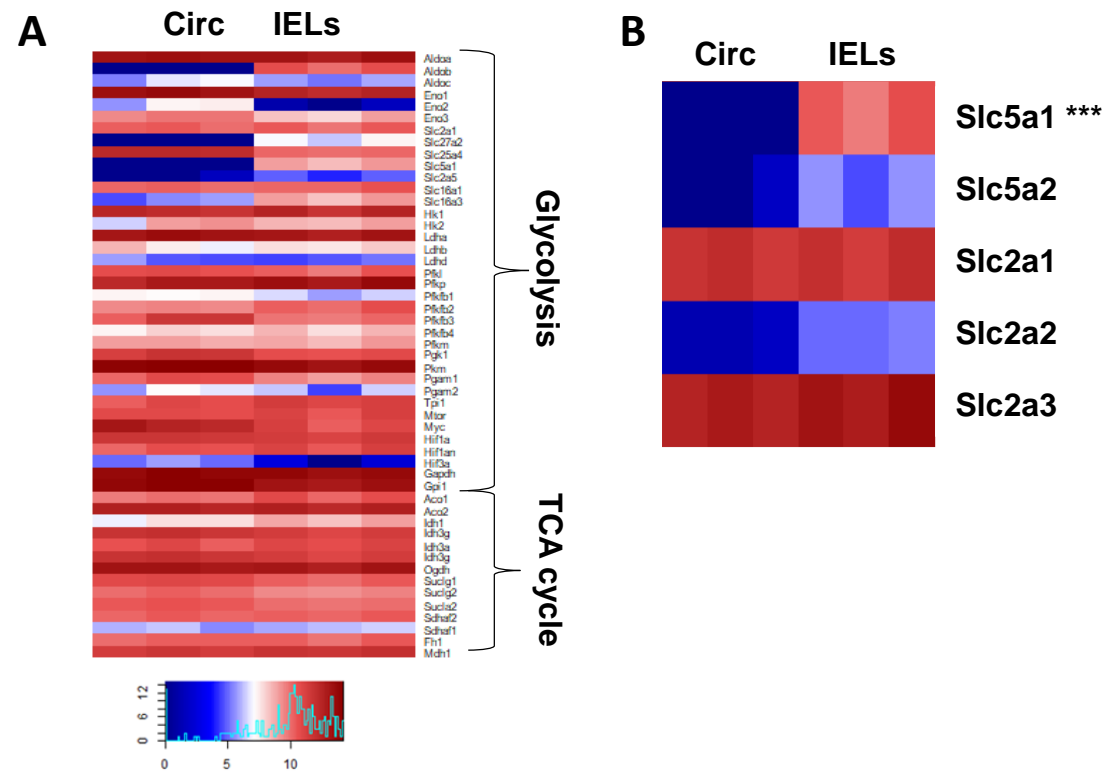

**Supplemental Figure 2. mRNA expression levels for glycolysis and TCA cycle in circulating memory CD8 T cells and IELs.** Circulating memory CD8<sup>+</sup> CD44<sup>hi</sup> T cells from spleen and IELs were flow sorted, and mRNA isolated after which RNA-seq was performed in triplicate (Konjar et al, Sci Immunol 2018). **(A)** Overview of the mRNA expression levels of enzymes involved in glycolysis or OXPHOS (TCA cycle). **(B)** Highlight of glucose transporters indicated, with no differences in Slc2a1, 2a2 and 2a3 mRNA levels, encoding for Gtut1, 2 and 3, but differential higher expression of Slc5a1 ( $p=2.5 \times 10^{-22}$ ), encoding SGLT1.

# Supplemental Figure 3

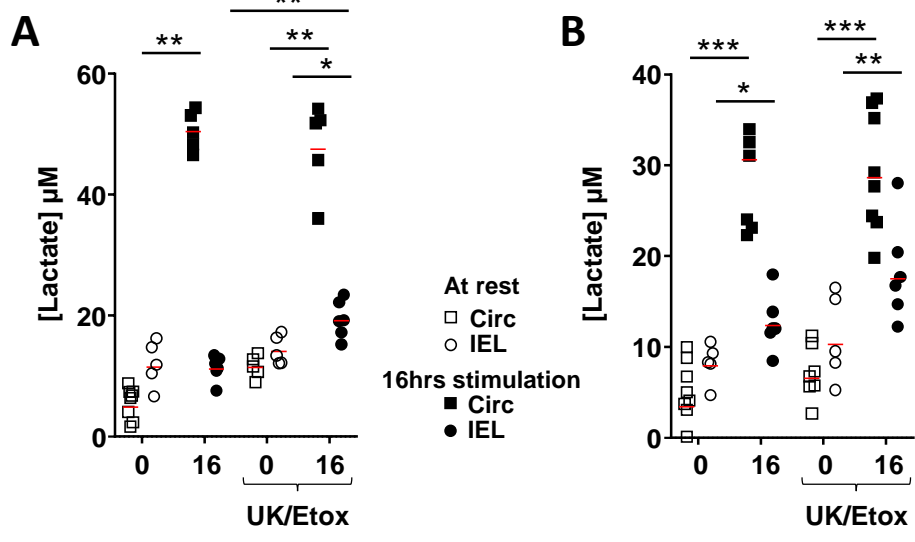

**Supplemental Figure 3. Lactate production in circulating CD8<sup>+</sup> T cells and IELs.** Circulating CD8 from spleen and IELs were sorted, seeded in 96-wells plate and **A**) intra- and **B**) extra-cellular lactate production was assessed under steady state (0) or upon 16 hours of activation (16), in the absence or presence of UK5099 and Etomoxir (circulating CD8 T cells: n=5-8, N=3, IELs n=5-6, N=3). Statistical analysis using Mann-Whitney test; \*p<0.05; \*\*p<0.01; \*\*\*p<0.001.

# Supplemental Figure 4

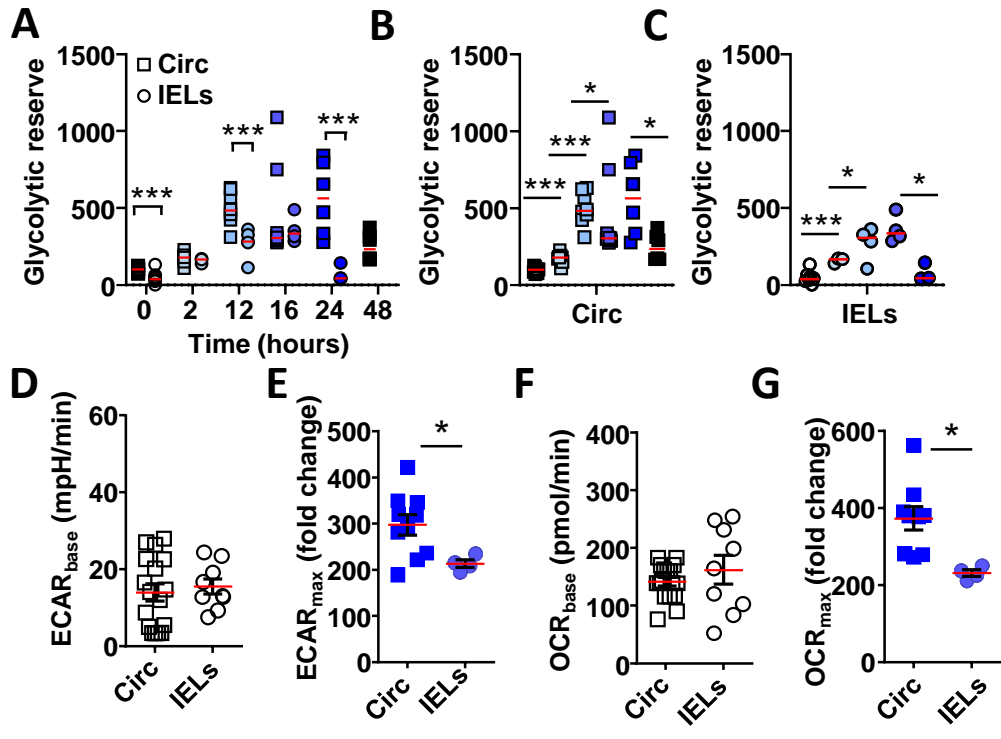

**Supplemental Figure 4. Glycolytic reserve and basal OCR and ECAR for circulating CD8 T cells and IELs.** Circulating CD8 from spleen and IELs were sorted, seeded in 24-wells Seahorse plate and OCR and ECAR levels were assessed. (A-C) Glycolytic reserve ( $ECAR_{oligomycin} - ECAR_{2DG}$ ) of circulating CD8 T cells (squares, B) and IELs (circles, C) at indicated time points after activation. Extracellular flux assessment of CD8 T cells from spleen (squares) and IELs from small intestine (circles) basal ECAR (D) max ECAR (normalized to basal ECAR,) (E), basal OCR (F) and max OCR (normalized to basal OCR) (G) Base values, Circ n=17, IELs n=9, Max values Circ n=10, IELs n=4). Statistical analysis using Mann-Whitney test; \*p<0.05; \*\*\*p<0.001

# Supplemental Figure 5

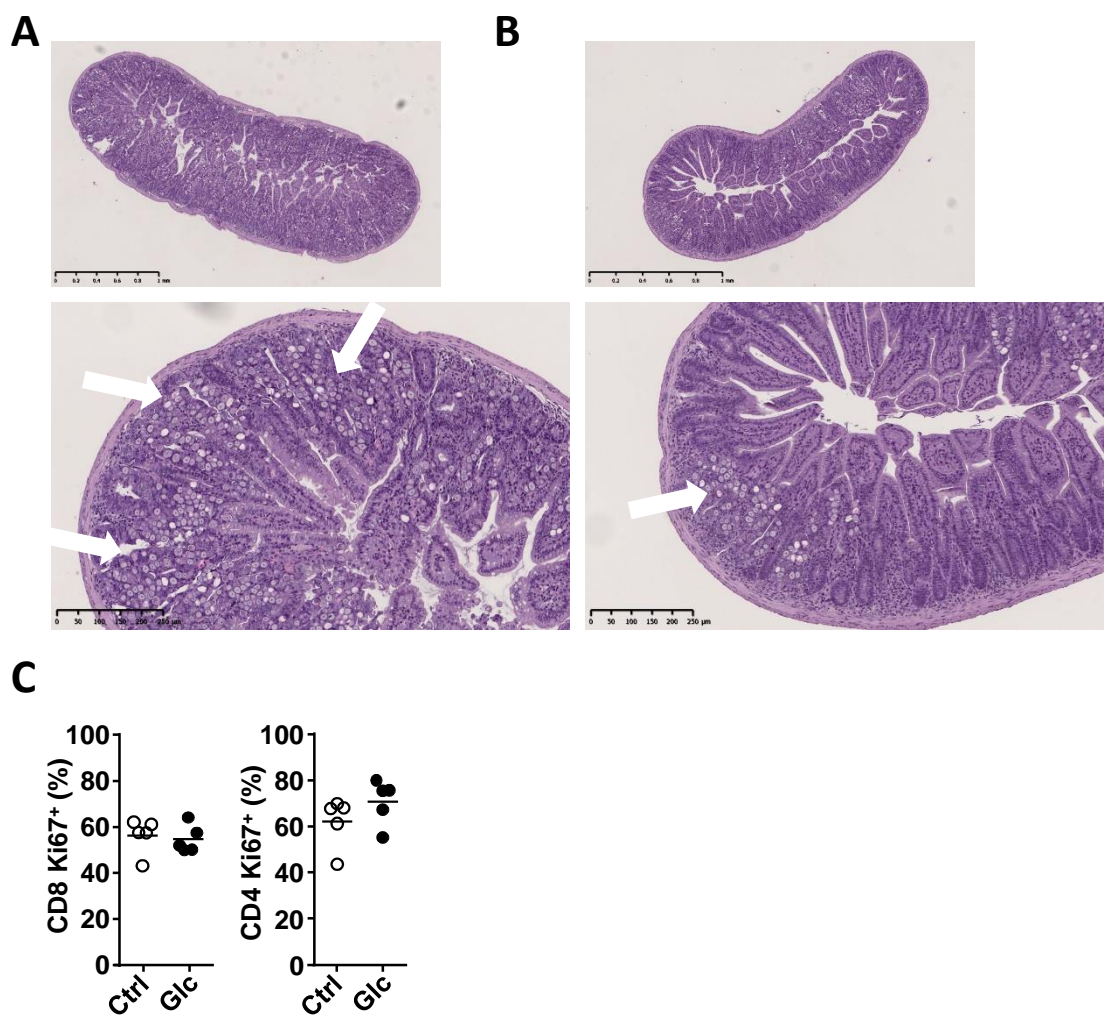

**Supplemental Figure 5. High glucose enhances intestinal pathogen clearance.** C57BL6/J mice were provided with (filled) or not (open) with 10% glucose water for 3 days prior to challenge via oral gavage with 1000 *Eimeria vermiformis* oocysts. **(A-B)** Histological sections of H&E staining from small intestine of control (A) mice and additional glucose fed mice (B) at day 10 of *Eimeria vermiformis* infection. Shown are overview and zoom from a representative mouse. Scale bar is 1mm in top panels and 250  $\mu$ m in enlargements, white arrows denote areas with oocysts, **(C)** Lamina propria T cells, CD8<sup>+</sup> and CD4<sup>+</sup> were assess for Ki67 staining by flow cytometry. Show a representative experiment, n=5, from two.
